# Supplementary material for: The Selection of Reference Genes for Quantitative Real-Time PCR in the Ashidan Yak Mammary Gland During Lactation and Dry Period
Source: MDPI journal article supplement (doi:10.3390/ani9110943), 2019-11-10
Supplement: s1 [file s1]

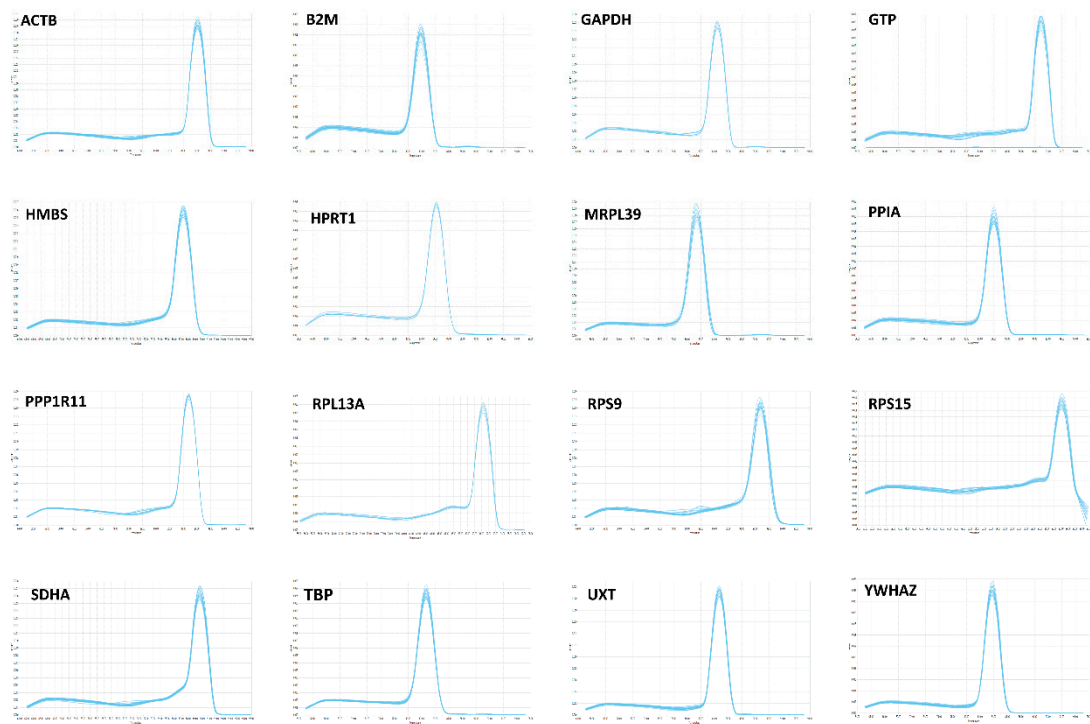

**Figure S1.** Melting curves of 16 candidate reference genes showing single peaks.
